# Supplementary material for: A Novel Photosensitizer 31,131-phenylhydrazine -Mppa (BPHM) and Its in Vitro Photodynamic Therapy against HeLa Cells
Source: PubMed Central journal article supplement (PMC6273471; doi:10.3390/molecules21050558), 2016-04-29
Supplement: molecules-21-00558-s001.pdf [file molecules-21-00558-s001.pdf]

# Supplementary Materials: A Novel Photosensitizer <sup>31</sup>,<sup>131</sup>-Phenylhydrazine-Mppa (BPHM) and Its *in Vitro* Photodynamic Therapy against Hela Cells

## 1. Statistical Analysis

Data were expressed as the mean  $\pm$  SD from these independent experiments. Statistic analysis was performed using the SPSS 19.0 for Windows. Comparisons between two groups were performed by *t*-test,  $p < 0.05$  considered statistically significant.

### Statistical Analysis Results

**Table S1.** IC<sub>50</sub> values obtained from the MTT assay (IC<sub>50</sub> was used for T-test).

| Experimental Groups | Times | IC <sub>50</sub> Values Obtained from the MTT Assay |
|---------------------|-------|-----------------------------------------------------|
| BPHM-PDT            | 1     | 8.899                                               |
|                     | 2     | 8.49                                                |
|                     | 3     | 10.246                                              |
| MPPA-PDT            | 1     | 10.901                                              |
|                     | 2     | 13.447                                              |
|                     | 3     | 12.851                                              |
| BPHM-PDT-SA         | 1     | 21.64                                               |
|                     | 2     | 19.155                                              |
|                     | 3     | 17.266                                              |
| BPHM-PDT-DM         | 1     | 16.015                                              |
|                     | 2     | 14.285                                              |
|                     | 3     | 12.441                                              |

**Table S2.** *T*-test between BPHM experiment groups and MPPA experiment groups. (IC<sub>50</sub> values were used for *T*-test).

| Group    | Levene's Test for Quality of Variances |       | <i>t</i> -Test for Equality of Means |        |                |                 |                       |                                           |            |            |
|----------|----------------------------------------|-------|--------------------------------------|--------|----------------|-----------------|-----------------------|-------------------------------------------|------------|------------|
|          | F                                      | Sig.  | t                                    | df     | Sig.(2-Tailed) | Mean Difference | Std. Error Difference | 95% Confidence Interval of the Difference |            |            |
|          |                                        |       |                                      |        |                |                 |                       | Lower                                     | Upper      |            |
| Sample 1 | Equal variance assumed                 | 0.386 | 0.568                                | -3.380 | 4              | 0.028           | -3.0980000            | 0.9165060                                 | -5.6426286 | -0.5533714 |
|          | Equal variance not assumed             |       |                                      | -3.380 | 3.607          | 0.033           | -3.0980000            | 0.9165060                                 | -5.7557191 | -0.4402809 |

$p = 0.028 < 0.05$  the difference was significant.

**Table S3.** T-test between BPHM experiment groups and BPHM-PDT-SA experiment groups. (IC<sub>50</sub> values were used for T-test).

| Group    | Levene's Test for Quality of Variances |       | t-Test for Equality of Means |        |                |                 |                       |                                           |             |            |
|----------|----------------------------------------|-------|------------------------------|--------|----------------|-----------------|-----------------------|-------------------------------------------|-------------|------------|
|          | F                                      | Sig.  | t                            | df     | Sig.(2-Tailed) | Mean Difference | Std. Error Difference | 95% Confidence Interval of the Difference |             |            |
|          |                                        |       |                              |        |                |                 |                       | Lower                                     | Upper       |            |
| Sample 2 | Equal variance assumed                 | 1.433 | 0.297                        | -7.386 | 4              | 0.002           | -10.1420000           | 1.3731684                                 | -13.9545268 | -6.3294732 |
|          | Equal variance not assumed             |       |                              | -7.386 | 2.681          | 0.007           | -10.1420000           | 1.3731684                                 | -14.8217601 | -5.4622399 |

$p = 0.002 < 0.05$  the difference was significant.

**Table S4.** T-test between BPHM experiment groups and BPHM-PDT-DM experiment groups. (IC<sub>50</sub> values were used for T-test).

| Group    | Levene's Test for Quality of Variances |       | t-Test for Equality of Means |        |                |                 |                       |                                           |            |            |
|----------|----------------------------------------|-------|------------------------------|--------|----------------|-----------------|-----------------------|-------------------------------------------|------------|------------|
|          | F                                      | Sig.  | t                            | df     | Sig.(2-Tailed) | Mean Difference | Std. Error Difference | 95% Confidence Interval of the Difference |            |            |
|          |                                        |       |                              |        |                |                 |                       | Lower                                     | Upper      |            |
| Sample 3 | Equal variance assumed                 | 0.690 | 0.453                        | -4.340 | 4              | 0.012           | -5.0353333            | 1.1602667                                 | -8.2567501 | -1.8139166 |
|          | Equal variance not assumed             |       |                              | -4.340 | 2.988          | 0.023           | -5.0353333            | 1.1602667                                 | -8.7361662 | -1.3345004 |

$p = 0.012 < 0.05$  the difference was significant.

**Table S5.** T-test between BPHM-PDT-SA experiment groups and BPHM-PDT-DM experiment groups. (IC<sub>50</sub> values were used for T-test).

| Group    | Levene's Test for Quality of Variances |       | t-Test for Equality of Means |       |                |                 |                       |                                           |           |           |
|----------|----------------------------------------|-------|------------------------------|-------|----------------|-----------------|-----------------------|-------------------------------------------|-----------|-----------|
|          | F                                      | Sig.  | t                            | df    | Sig.(2-Tailed) | Mean Difference | Std. Error Difference | 95% Confidence Interval of the Difference |           |           |
|          |                                        |       |                              |       |                |                 |                       | Lower                                     | Upper     |           |
| Sample 4 | Equal variance assumed                 | 0.130 | 0.737                        | 3.127 | 4              | 0.035           | 5.1083333             | 1.6336092                                 | 0.5727070 | 9.6439597 |
|          | Equal variance not assumed             |       |                              | 3.127 | 3.843          | 0.037           | 5.1083333             | 1.6336092                                 | 0.4987857 | 9.7178810 |

$p = 0.035 < 0.05$ . the difference was significant.

## 2. Dynamic Light Scattering (DLS) Measurement

BPHM possessed the hydrophobic character due to the phenylhydrazine structure, hence it may agglomerate when subjected to aqueous solution. In order to investigate how BPHM enters cells (in molecular states or nanoparticles), we performed dynamic light scattering (DLS) measurement in phosphate buffer saline.

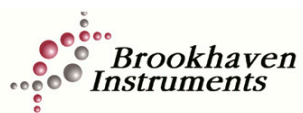

## Basic DLS Report

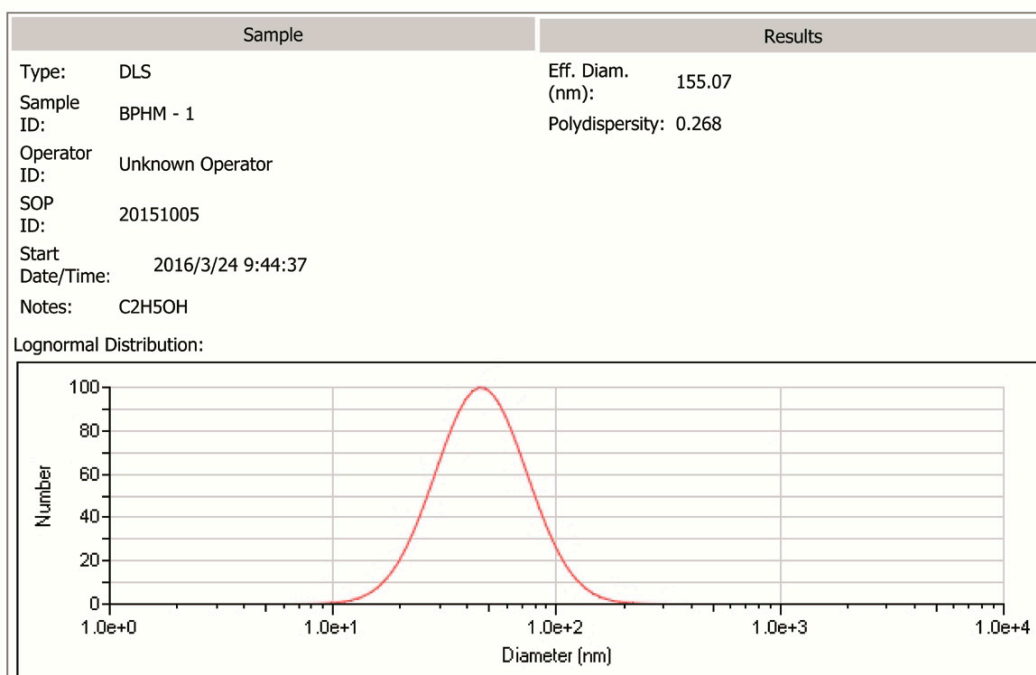

Figure S1. Dynamic light scattering (DLS) measurement in phosphate buffer saline.
